# Supplementary material for: Analysis of Drosophila melanogaster testis transcriptome
Source: PubMed Central journal article supplement (PMC6154878; doi:10.1186/s12864-018-5085-z), 2018-09-24
Supplement: 12864_2018_5085_MOESM1_ESM.pdf [file 12864_2018_5085_MOESM1_ESM.pdf]

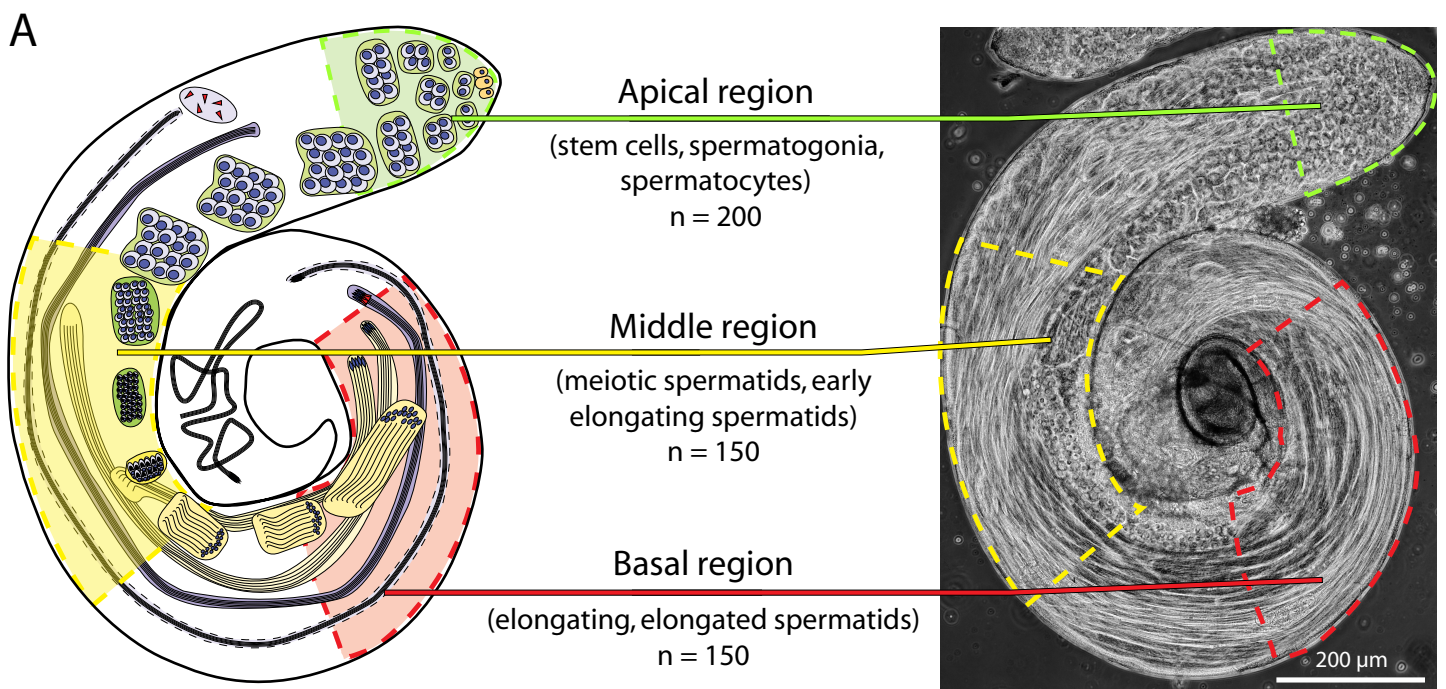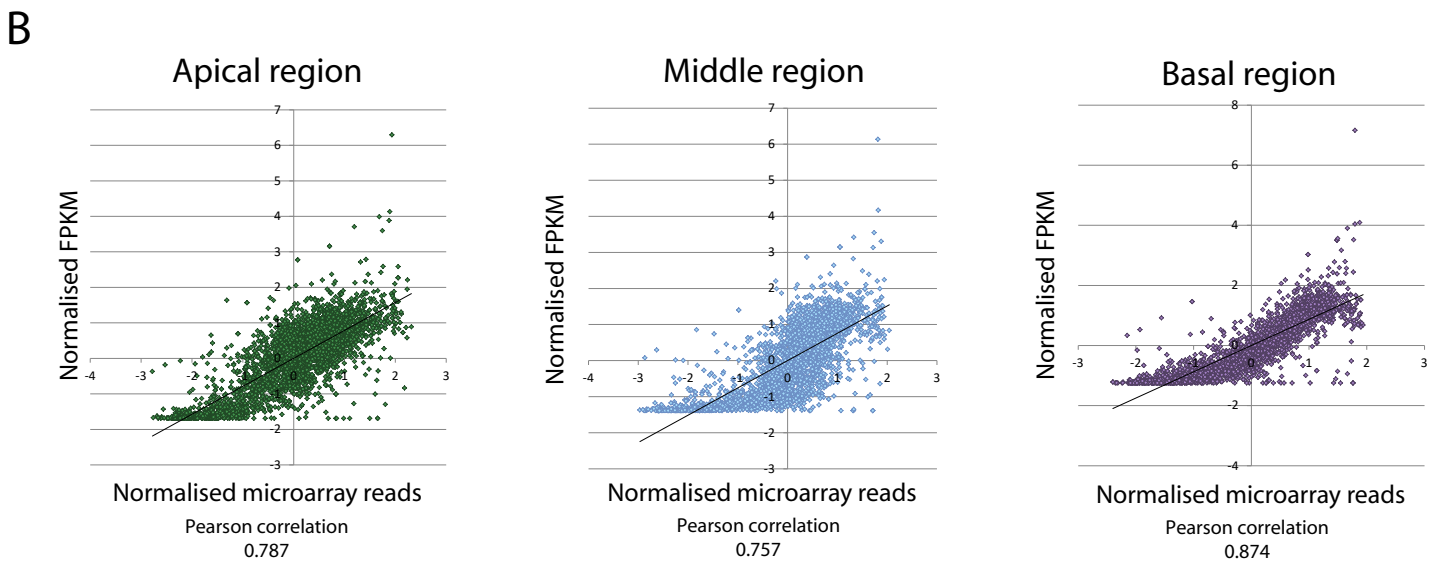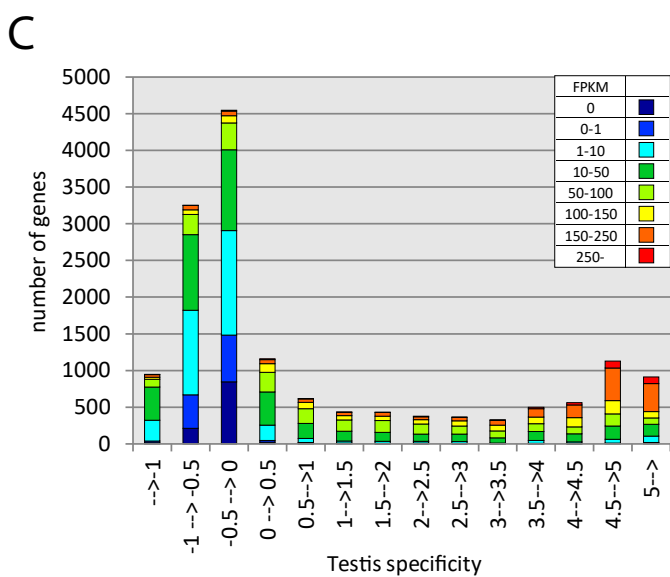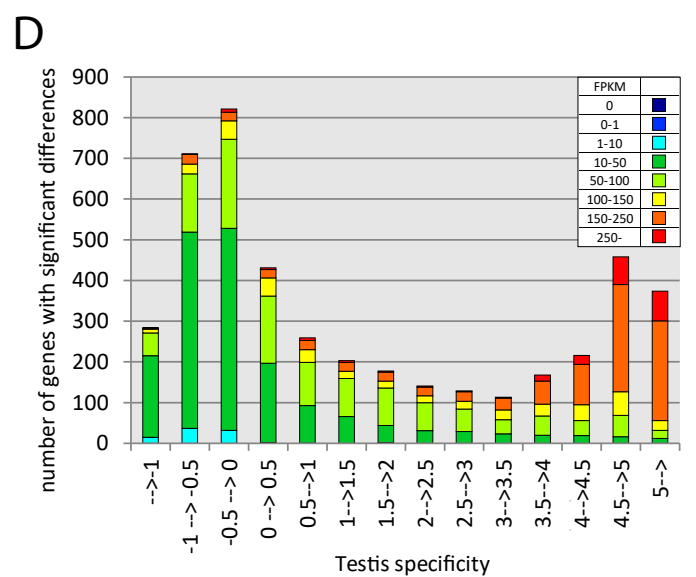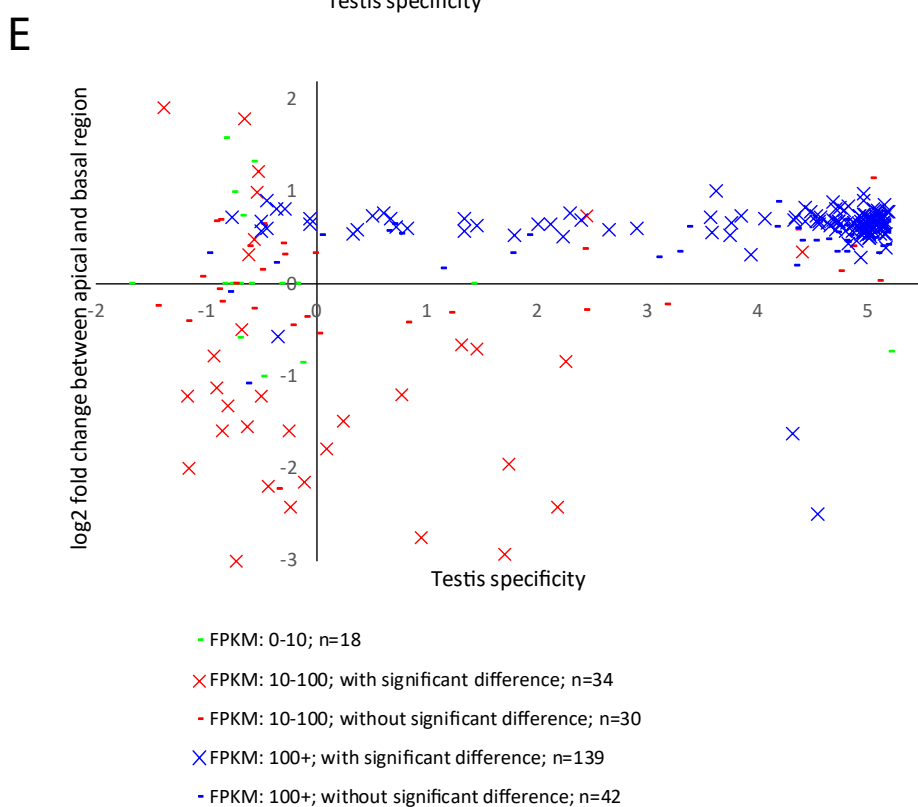

**FigS1. Testis sample preparation and analysis of RNA-Seq results**

(A) Schematic representation of the isolated apical, middle and basal testis regions with the indicated stages of spermatogenesis. (B) Charts represent the correlation of gene expression-based on normalised microarray data<sup>6</sup> and normalised RNA-Seq data of male-biased genes (Sebida database) in different regions of the testis (C) Transcript levels of genes are clustered based on the testis specificity index. (D) Transcript levels of genes showing significant expression changes are clustered based on the testis specificity index. (E) Scatter plot represents the log<sub>2</sub> fold changes of transcript levels of genes of sperm proteome<sup>11, 12</sup> as a function of testis specificity index.

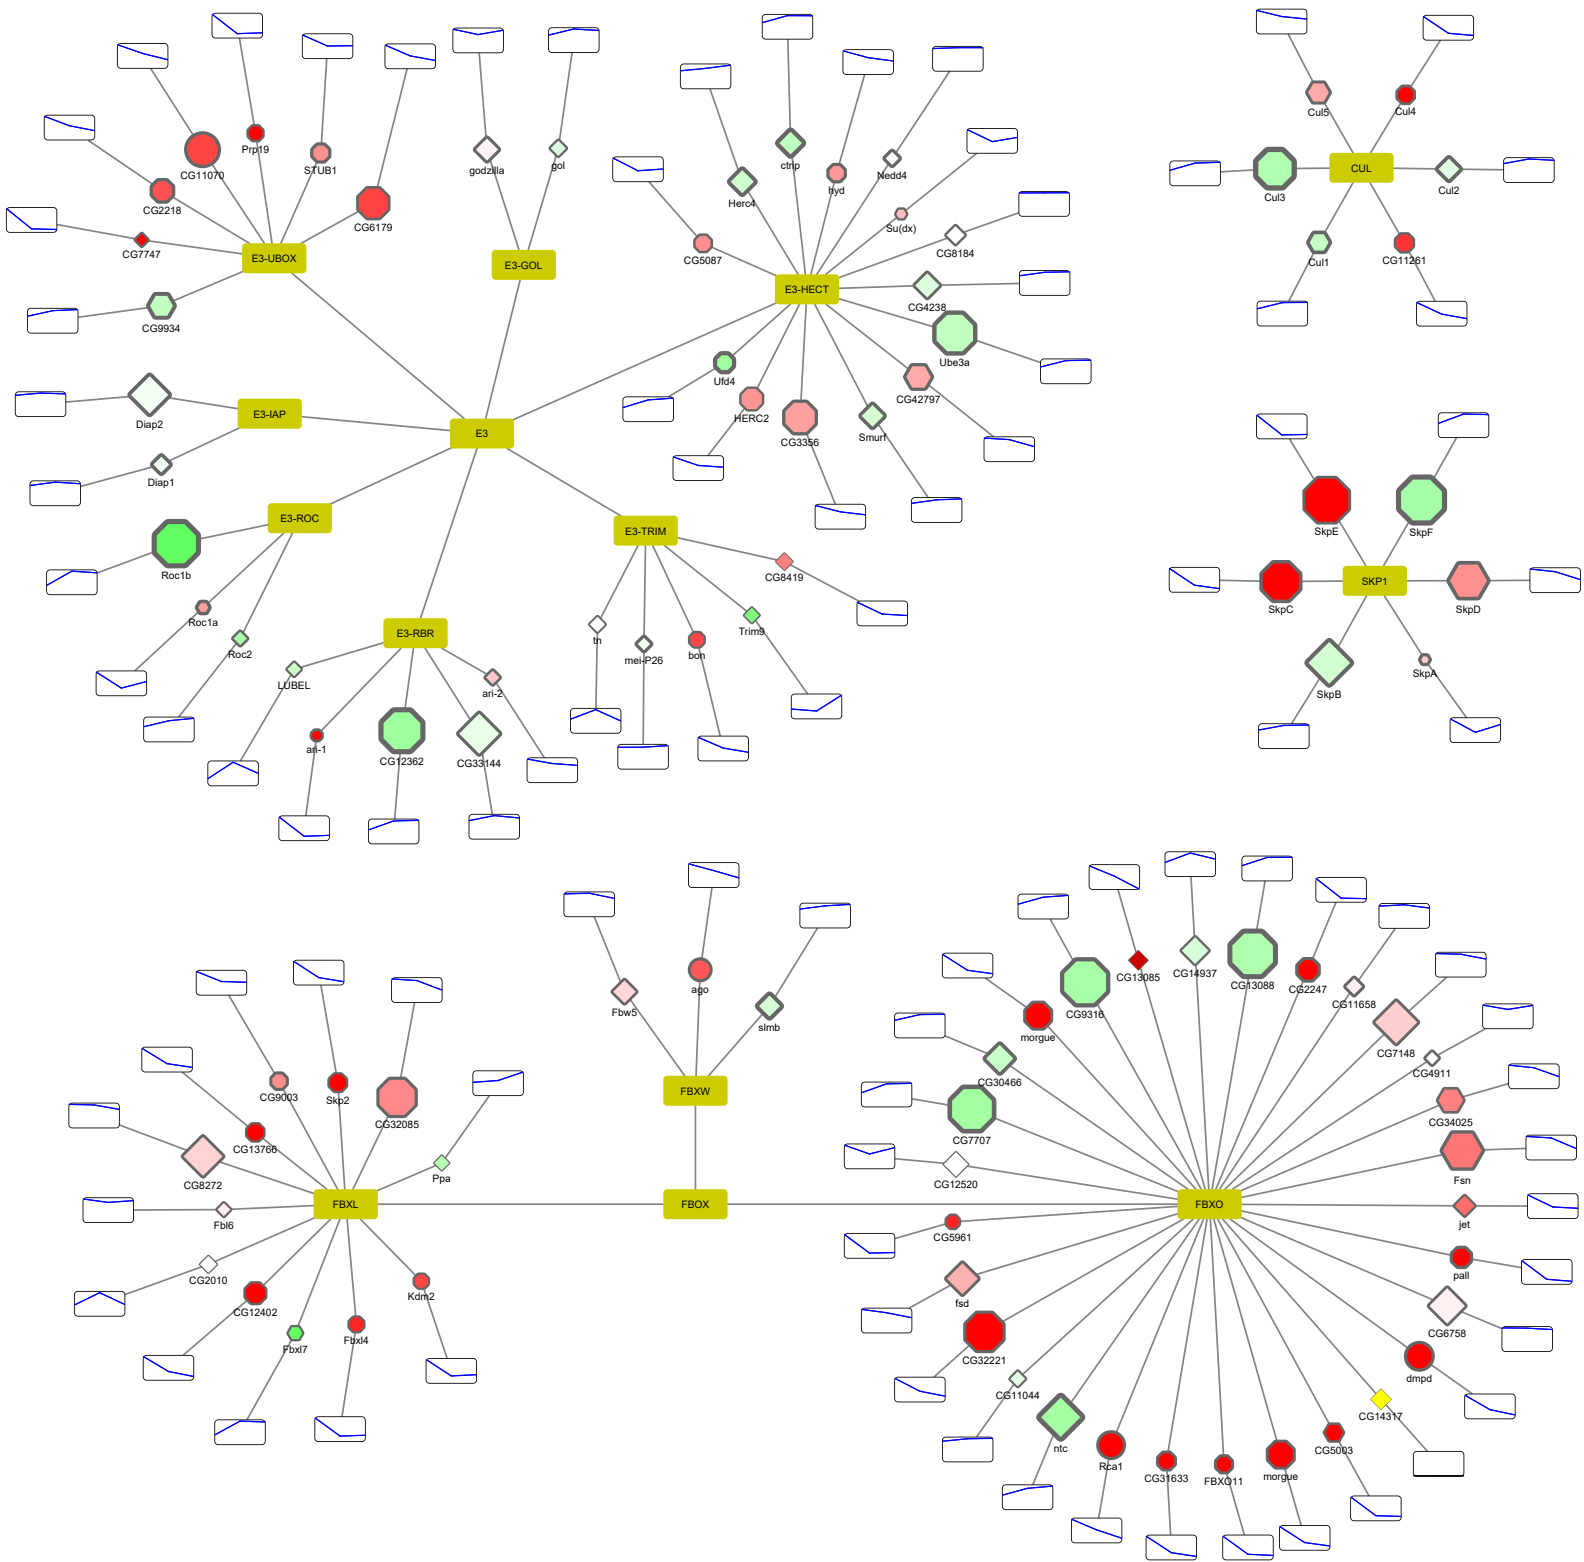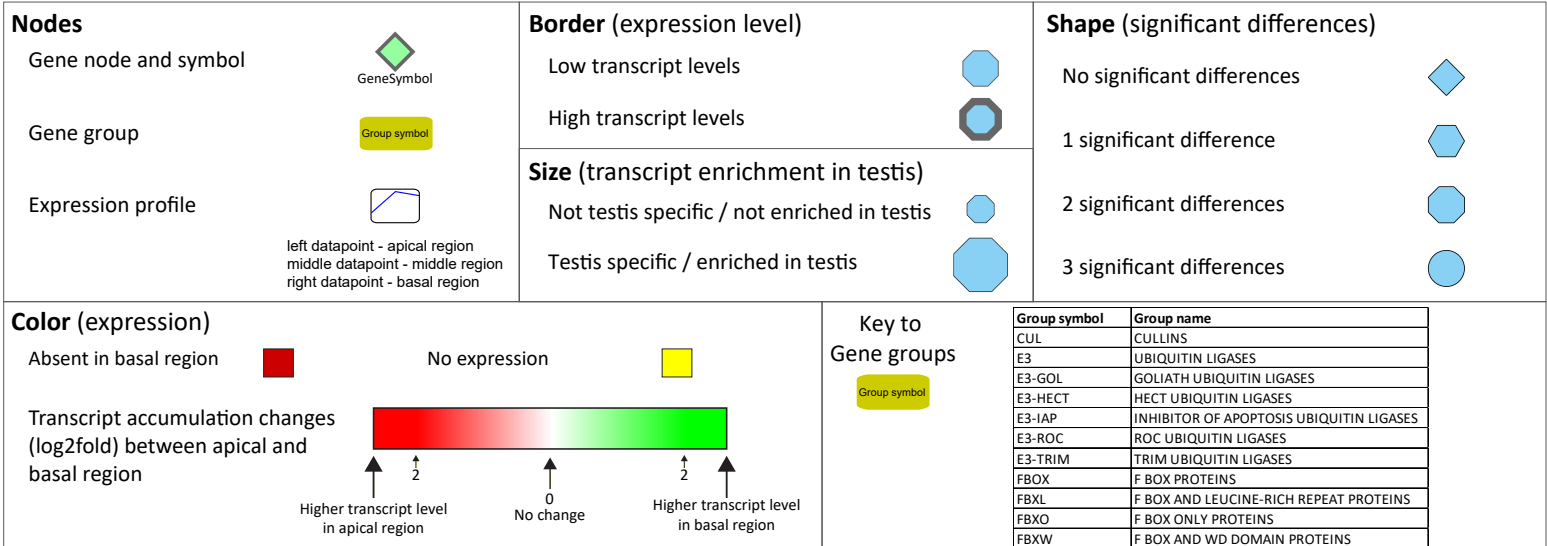

**FigS.2. Transcript distribution of the member of the ubiquitin system E3, and Cullin, SKP1 and F-Box genes visualized by Cytoscape.**

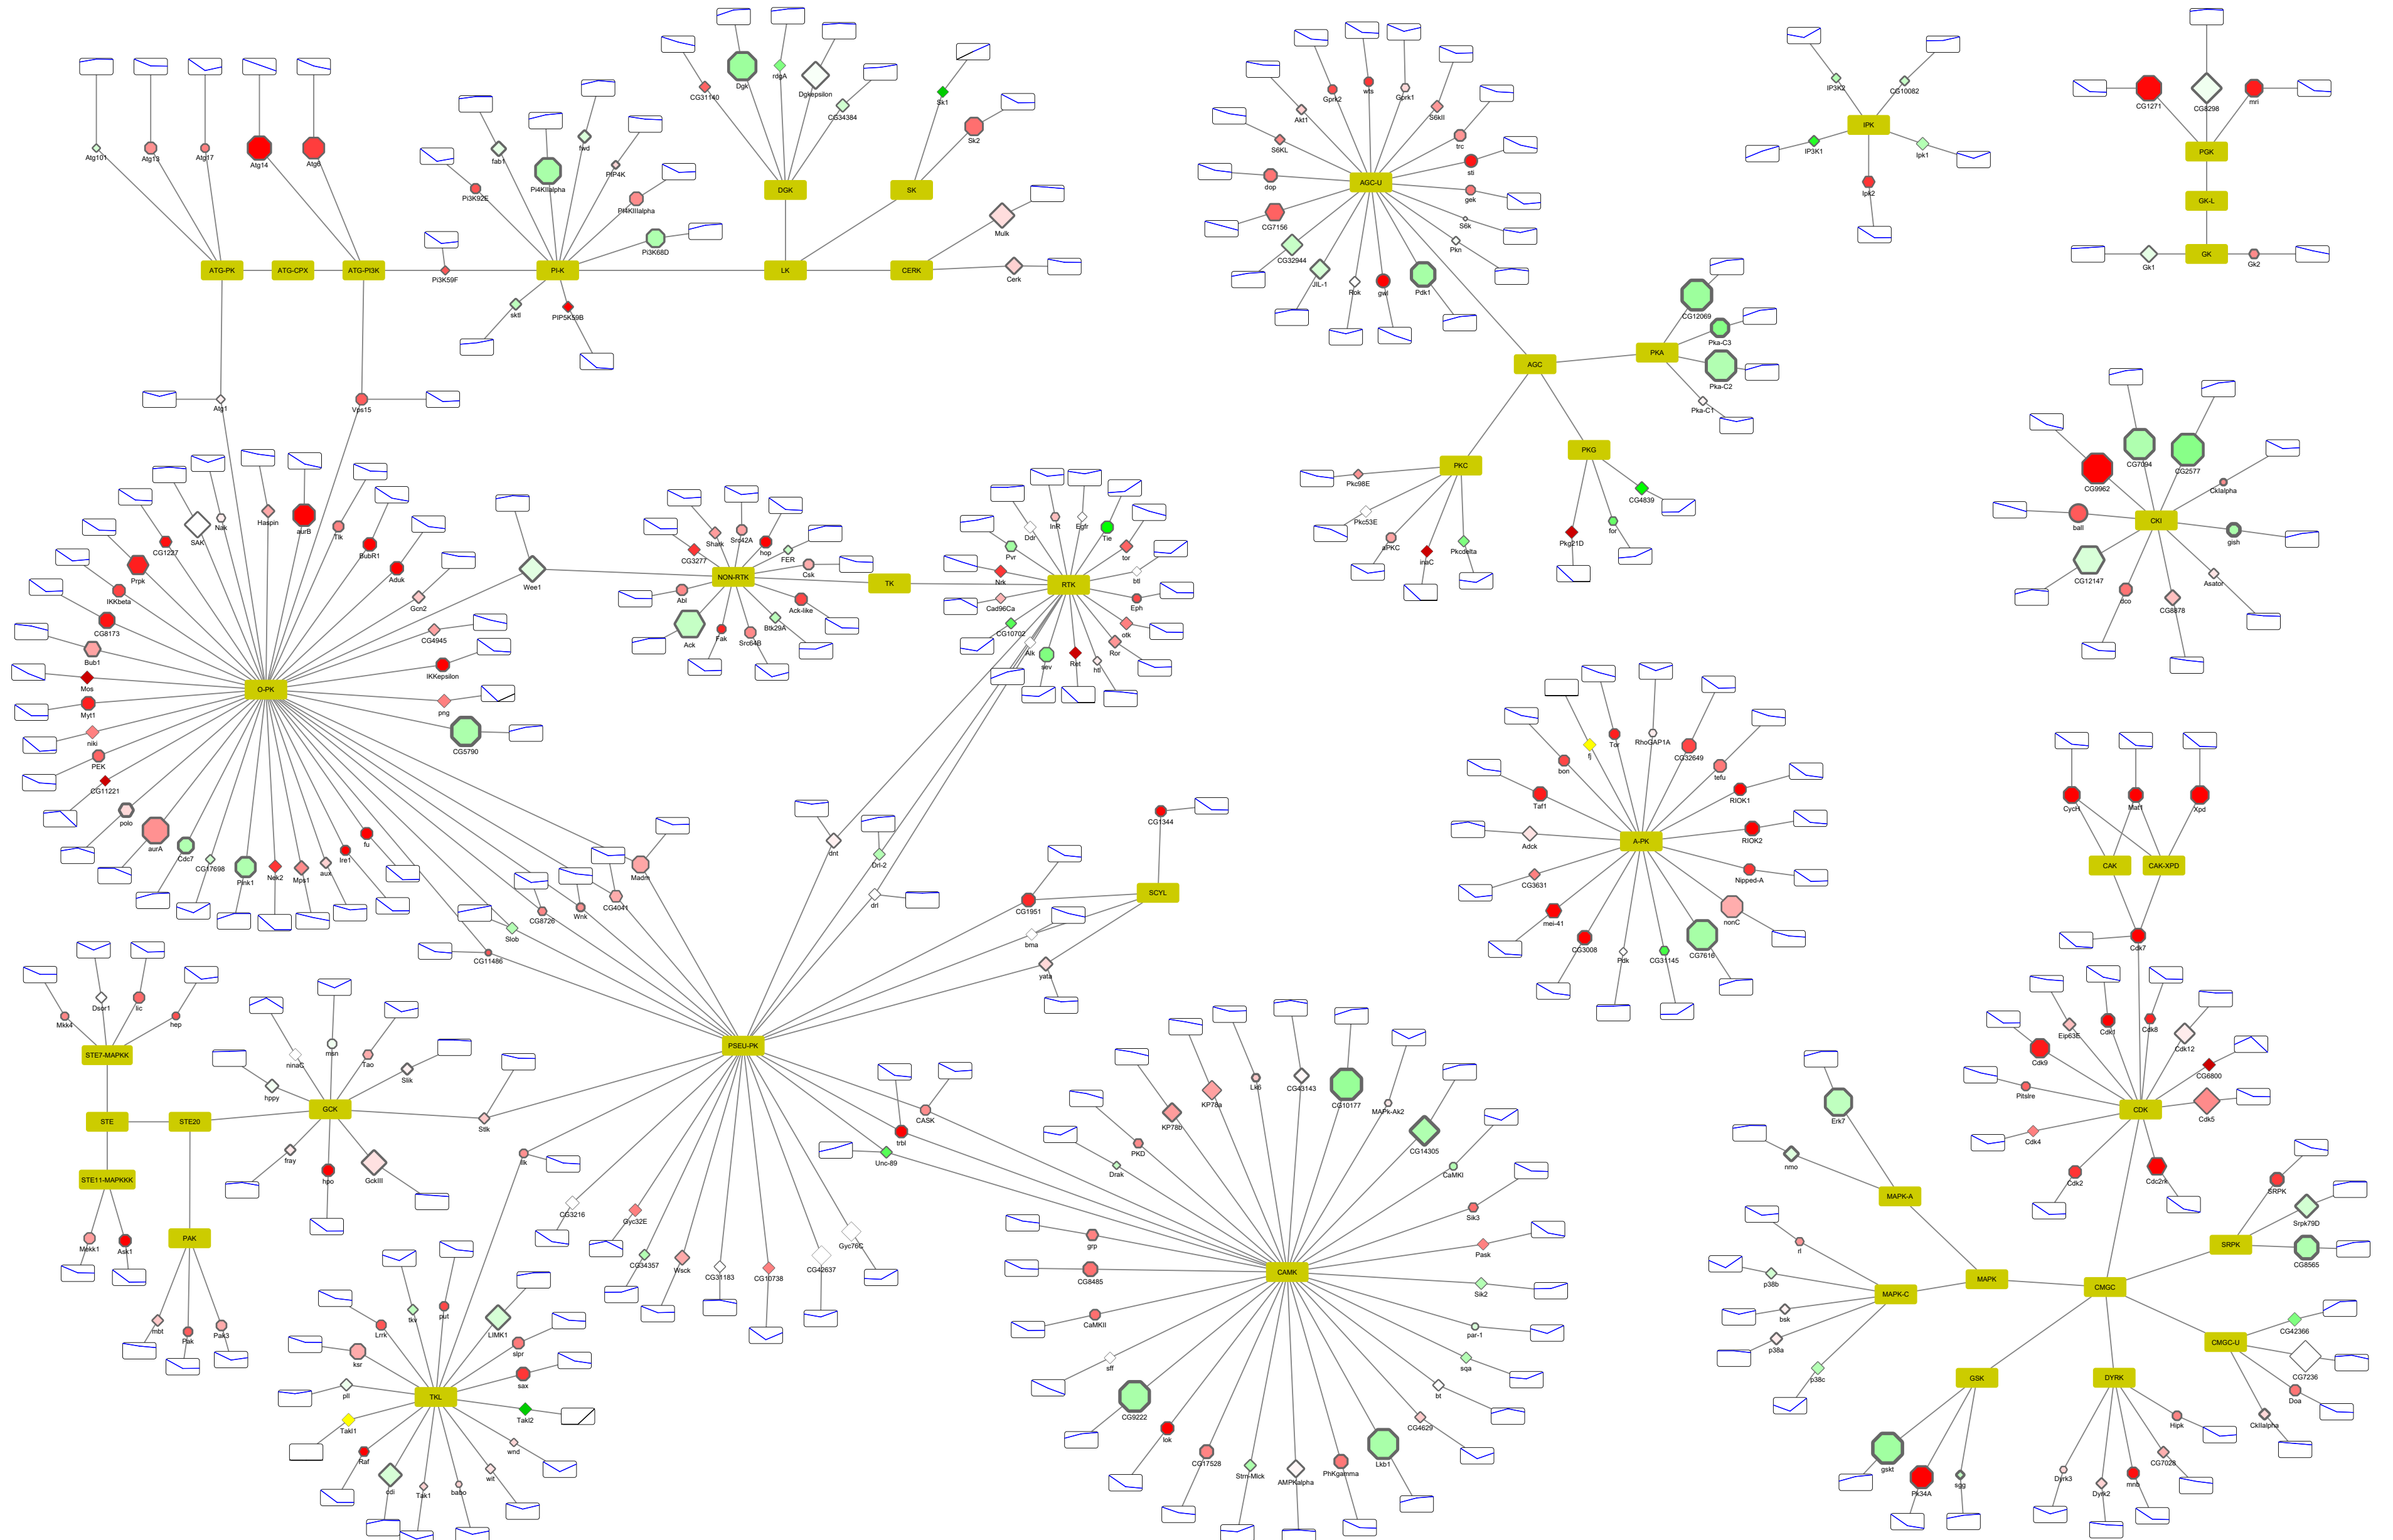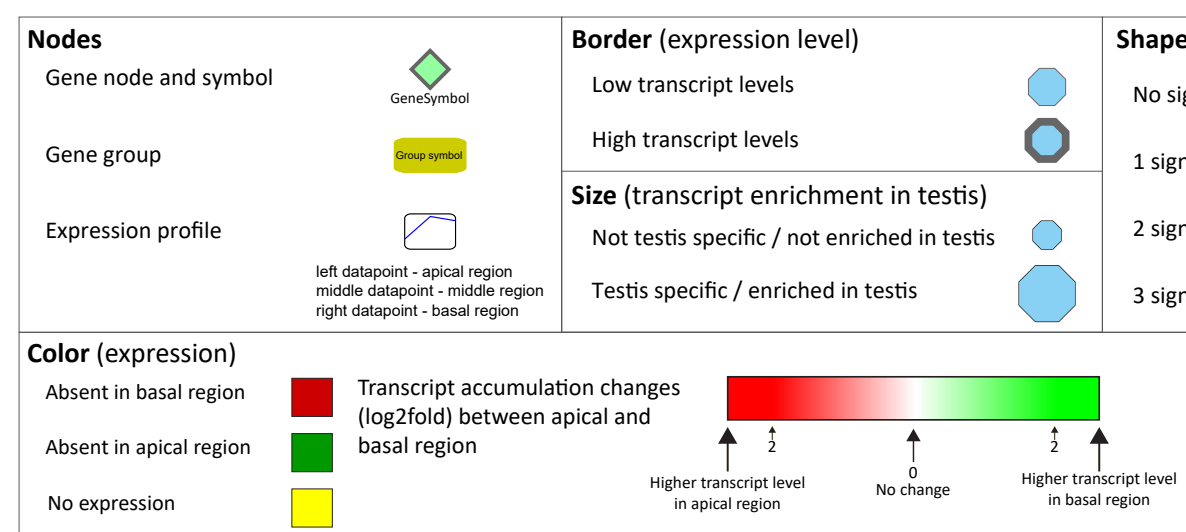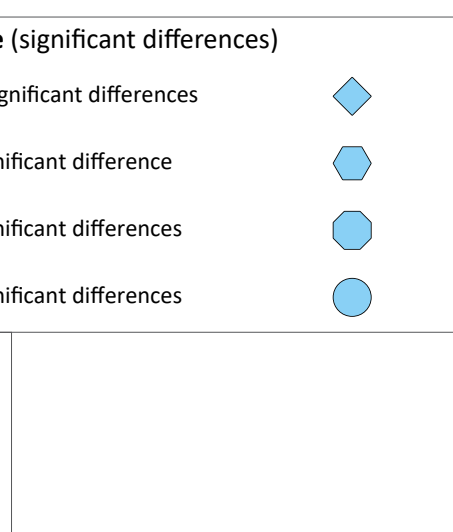

**Key to Gene groups**

| Group symbol | Group name                                                  |
|--------------|-------------------------------------------------------------|
| AGC          | AGC KINASES                                                 |
| AGC-U        | AGC KINASES (UNCLASSIFIED)                                  |
| A-PK         | ATYPICAL MITOGEN ACTIVATED PROTEIN KINASES                  |
| ATG-CPX      | AUTOPHAGY-RELATED COMPLEXES                                 |
| ATG-PI3K     | AUTOPHAGY-SPECIFIC PHOSPHATIDYLINOSITOL 3-KINASE COMPLEX    |
| ATG-PK       | ATG1 PROTEIN KINASE COMPLEX                                 |
| CAK          | CDK-ACTIVATING KINASE COMPLEX                               |
| CAK-XPD      | CDK-ACTIVATING KINASE-XERODERMA PIGMENTOSUM D COMPLEX       |
| CAMK         | CALCIUM/CALMODULIN-DEPENDENT PROTEIN KINASES                |
| CDK          | CYCLIN DEPENDENT KINASES                                    |
| CERK         | CERAMIDE KINASES                                            |
| CKI          | CKI KINASES                                                 |
| CMGC         | CMGC KINASES                                                |
| CMGC-U       | CMGC KINASES (UNCLASSIFIED)                                 |
| DGK          | DIACYLGLYCEROL KINASES                                      |
| DYRK         | DUAL SPECIFICITY TYROSINE-PHOSPHORYLATION REGULATED KINASES |
| GCK          | GERMINAL CENTER KINASES                                     |
| GK           | GLYCEROL KINASE                                             |
| GK-L         | GLYCEROL KINASE-LIKE                                        |
| GSK          | GLYCOGEN SYNTHASE 3 KINASES                                 |
| IPK          | INOSITOL PHOSPHATE KINASES                                  |
| LK           | LIPID KINASES                                               |

| Group symbol | Group name                                               |
|--------------|----------------------------------------------------------|
| MAPK         | MITOGEN ACTIVATED PROTEIN KINASES                        |
| MAPK-A       | ATYPICAL MITOGEN ACTIVATED PROTEIN KINASES               |
| MAPK-C       | CONVENTIONAL MITOGEN ACTIVATED PROTEIN KINASES           |
| NON-RTK      | NON-RECEPTOR TYROSINE KINASES                            |
| O-PK         | OTHER CONVENTIONAL PROTEIN KINASE DOMAIN KINASES         |
| PAK          | P21-ACTIVATED KINASES                                    |
| PKG          | PSUEDO-GLYCEROL KINASE                                   |
| PI-K         | PHOSPHATIDYLINOSITOL KINASES                             |
| PKA          | PROTEIN KINASE A FAMILY                                  |
| PKC          | PROTEIN KINASE C FAMILY                                  |
| PKG          | PROTEIN KINASE G FAMILY                                  |
| PSEU-PK      | PROTEIN PSEUDOKINASES (KNOWN AND PUTATIVE PSEUDOKINASES) |
| RTK          | RECEPTOR TYROSINE KINASES                                |
| SCYL         | SCYL PSEUDOKINASES                                       |
| SK           | SPHINGOSINE KINASES                                      |
| SRPK         | SERINE-ARGININE PROTEIN KINASES                          |
| STE          | STE KINASES                                              |
| STE11-MAPKKK | STE11 KINASES (MAPK KINASE KINASES)                      |
| STE20        | STE20 KINASES                                            |
| STE7-MAPKK   | STE7 KINASES (MAPK KINASES)                              |
| TK           | TYROSINE KINASES                                         |
| TKL          | TYROSINE KINASE-LIKE KINASES                             |

FigS.3. Distribution of transcripts of kinases visualized by Cytoscape.

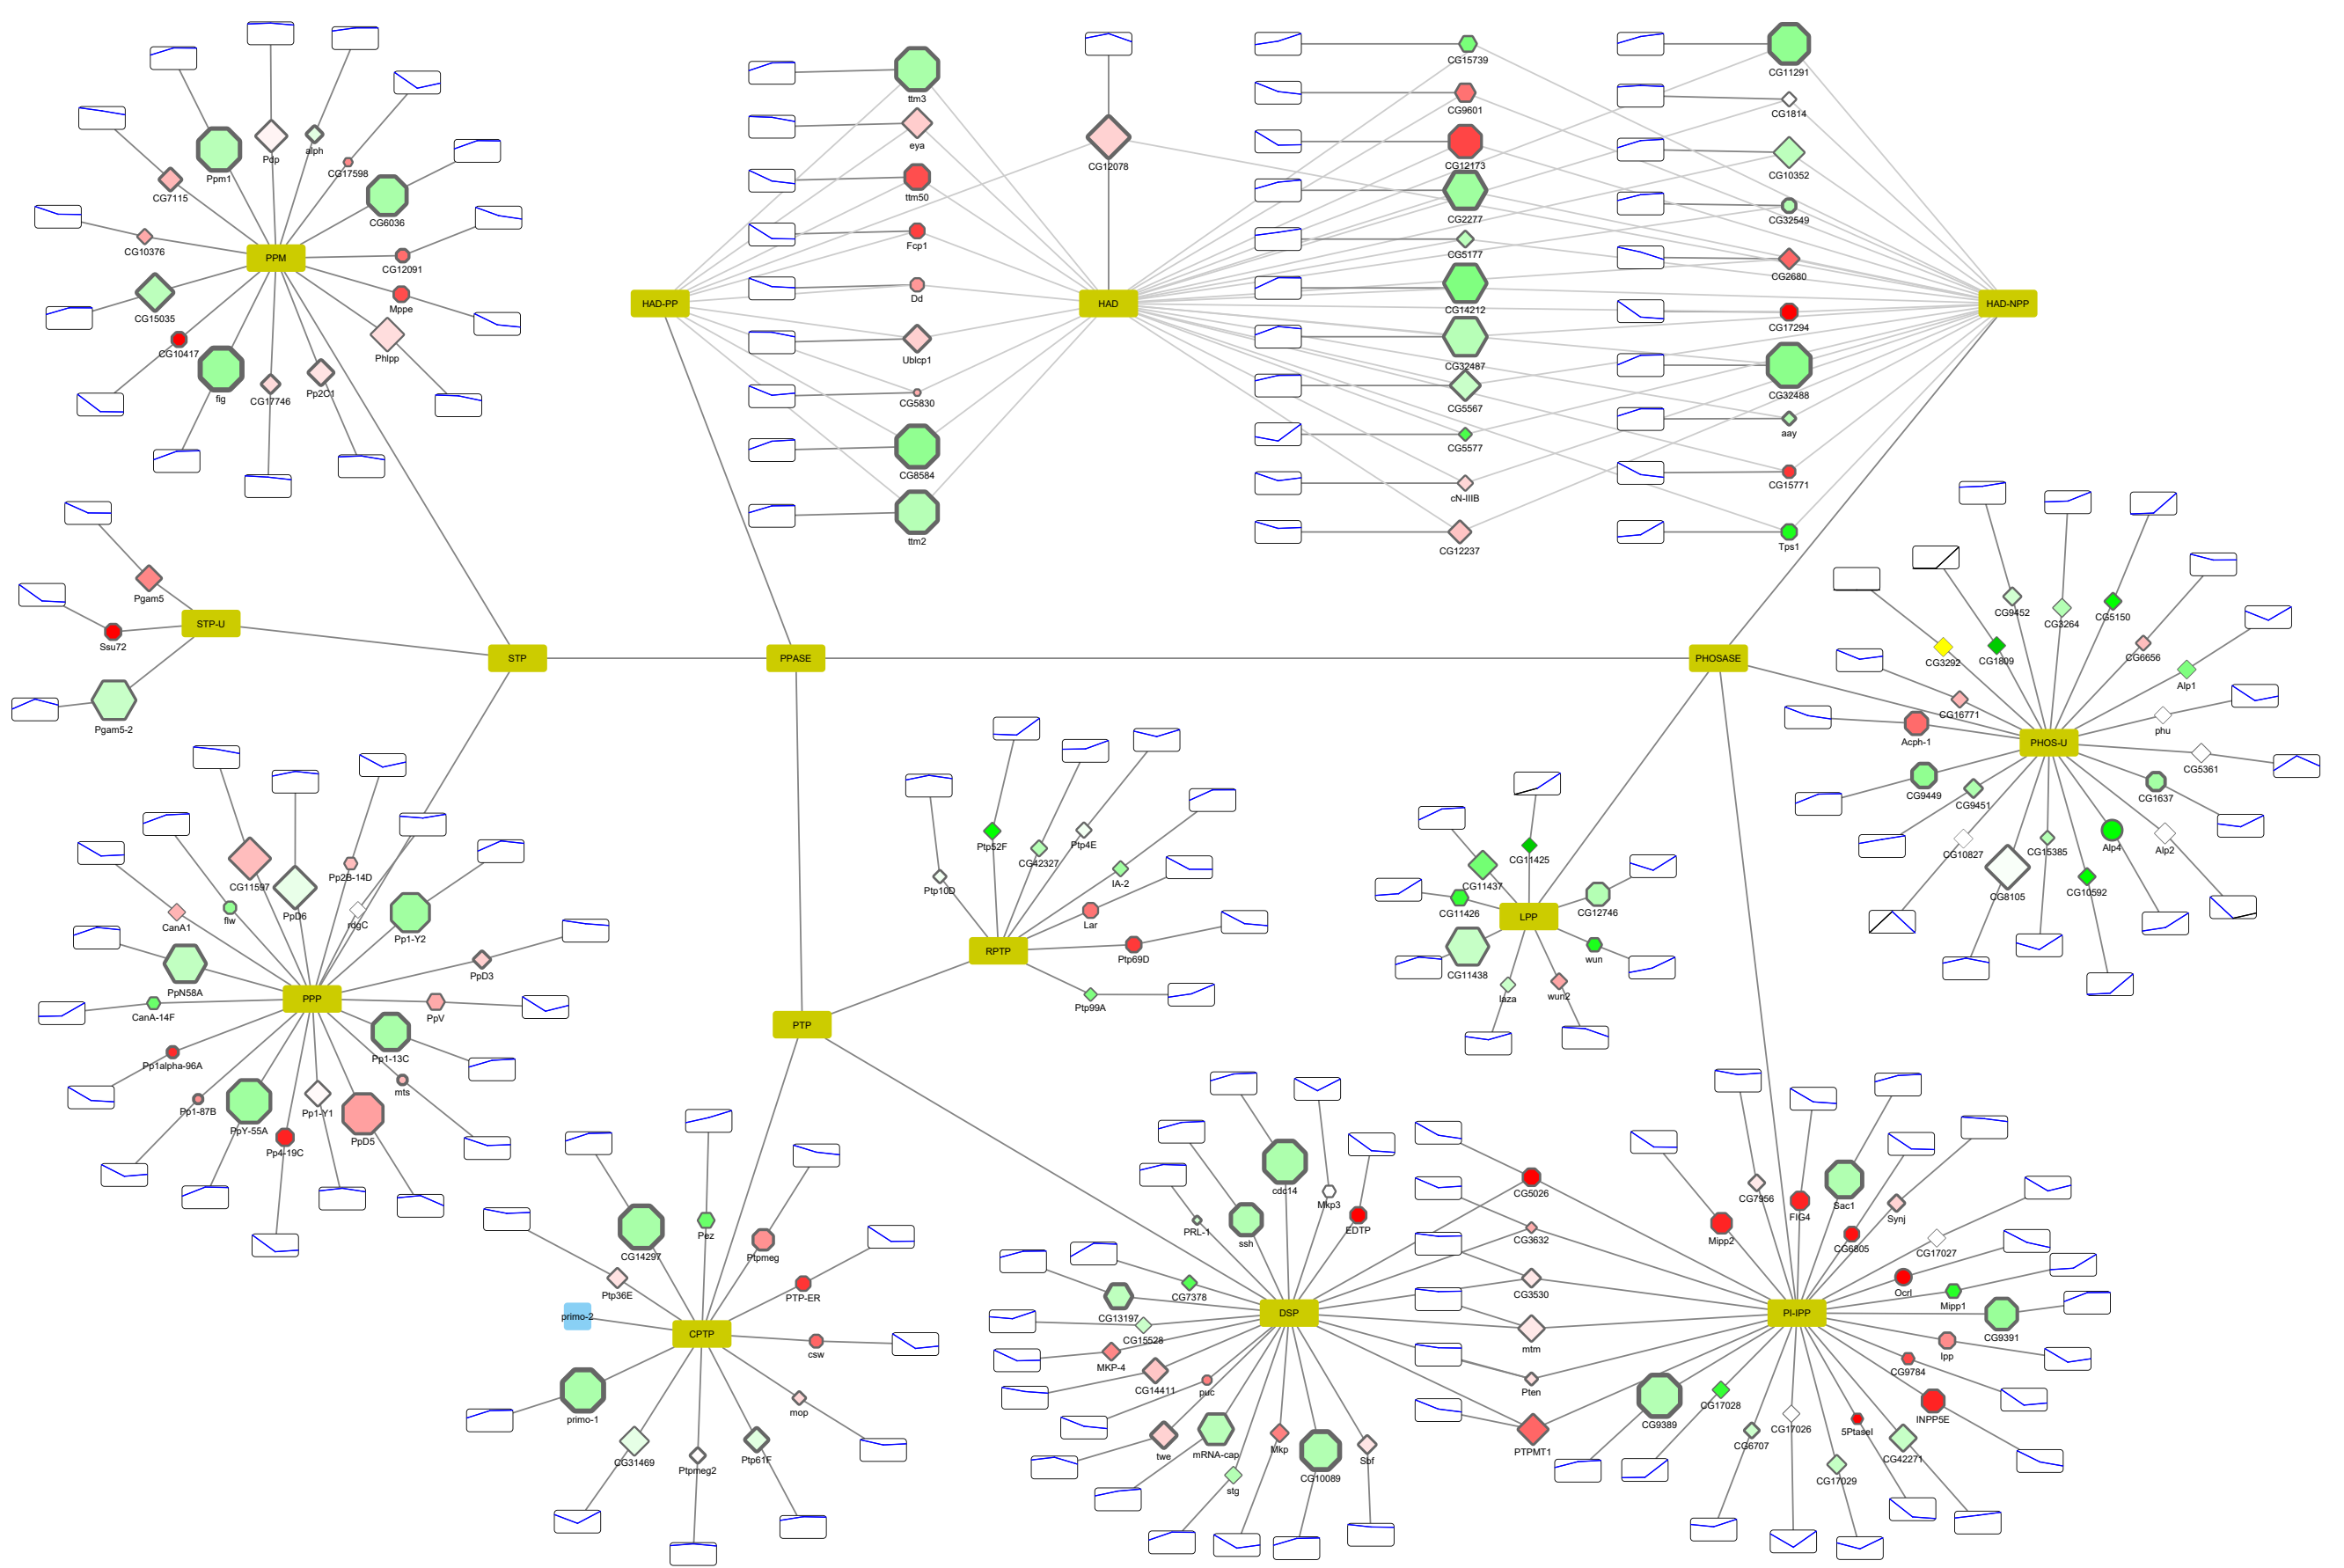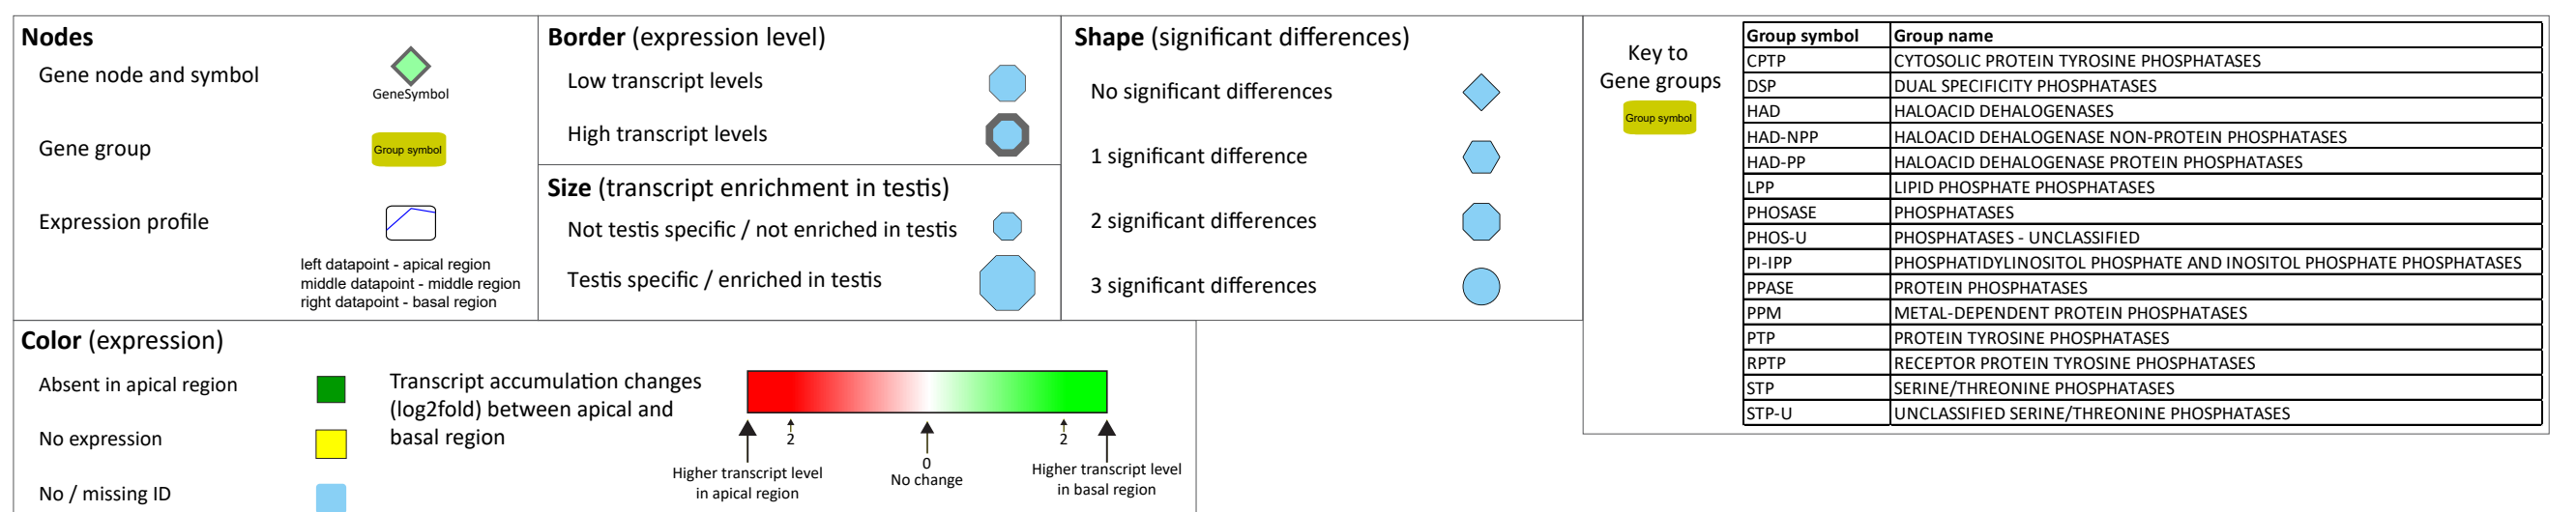

FigS.4. Distribution of transcripts of phosphatases visualized by Cytoscape.

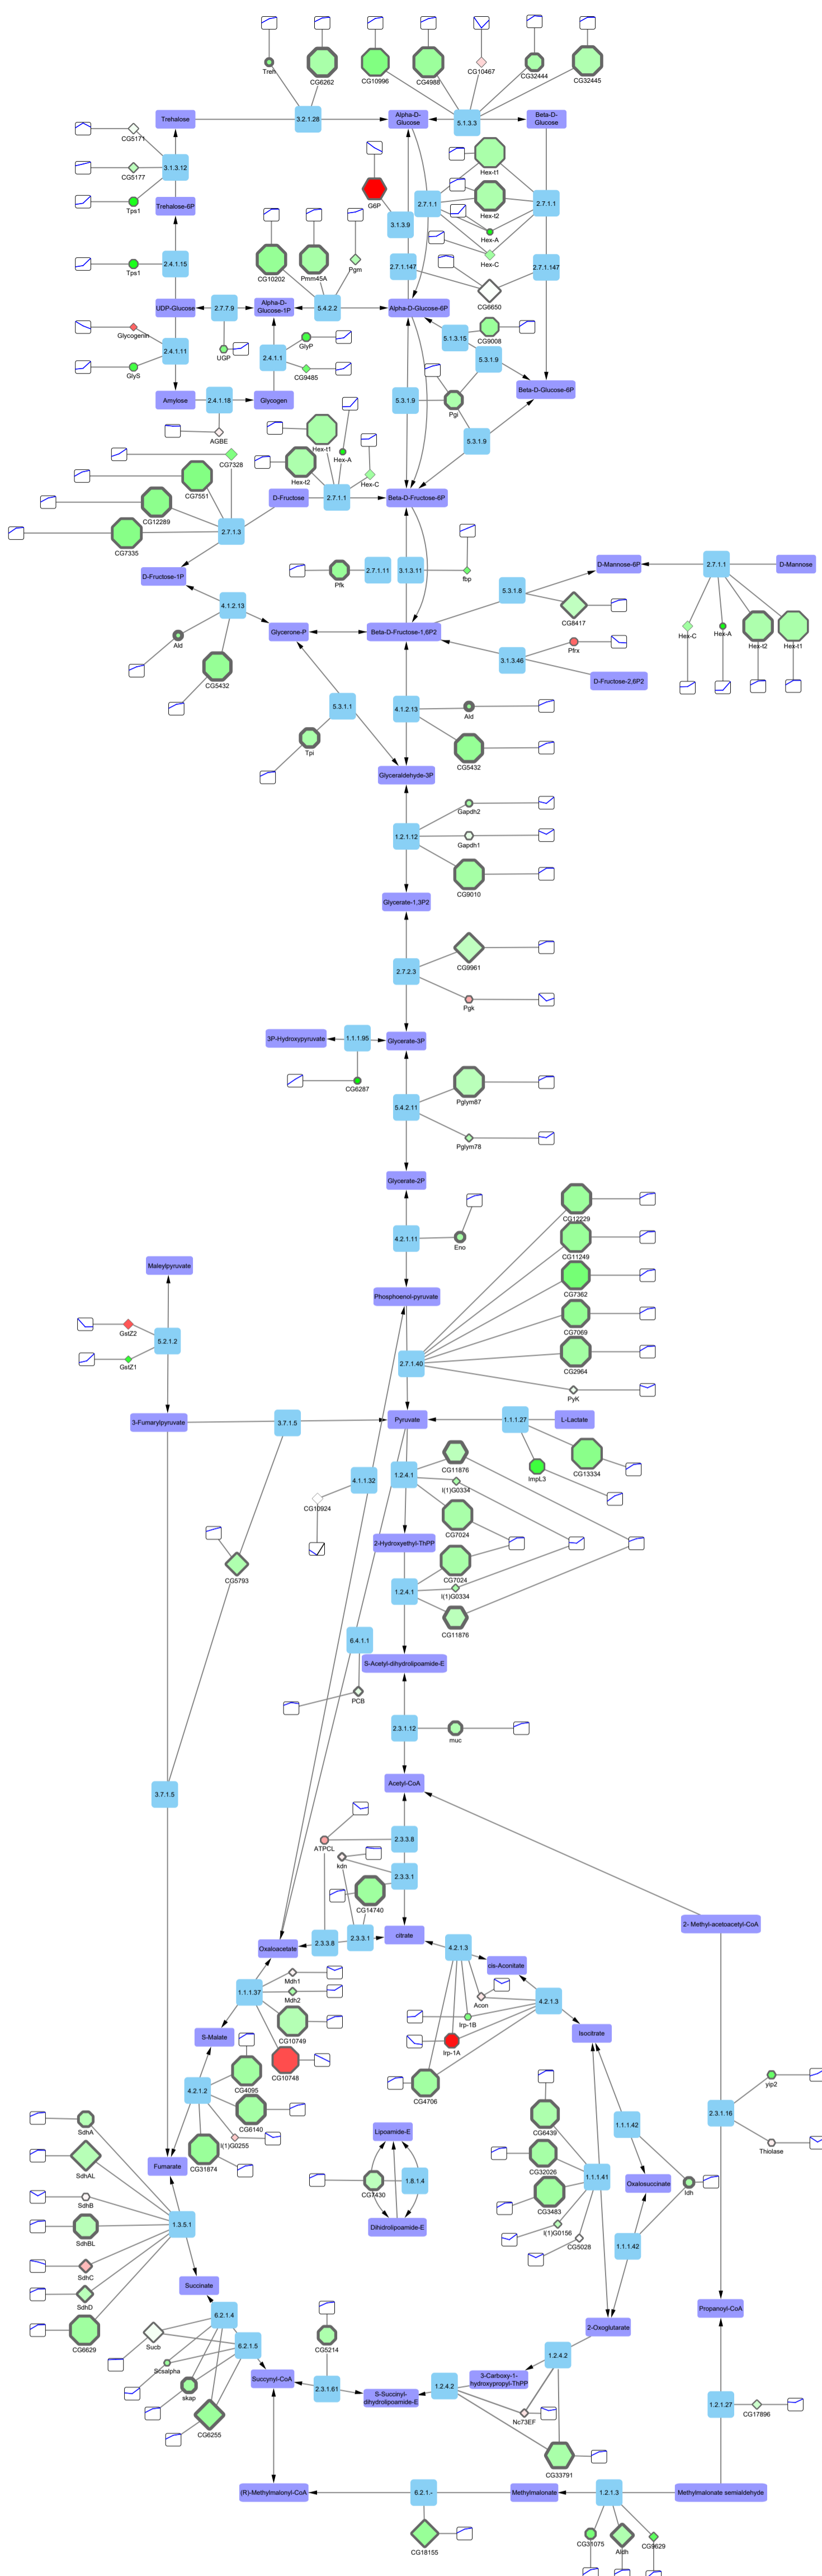

|                                                                                                                                                                                                                                                                                                                                                                                                                                                                                                                                                                                           |                                                                                                                                                                                                                                                                                                                                                                                                                                                                                                                                                                              |                                                                                                                                                                                                                                                                                                                                                                                                                                                                                                                    |
|-------------------------------------------------------------------------------------------------------------------------------------------------------------------------------------------------------------------------------------------------------------------------------------------------------------------------------------------------------------------------------------------------------------------------------------------------------------------------------------------------------------------------------------------------------------------------------------------|------------------------------------------------------------------------------------------------------------------------------------------------------------------------------------------------------------------------------------------------------------------------------------------------------------------------------------------------------------------------------------------------------------------------------------------------------------------------------------------------------------------------------------------------------------------------------|--------------------------------------------------------------------------------------------------------------------------------------------------------------------------------------------------------------------------------------------------------------------------------------------------------------------------------------------------------------------------------------------------------------------------------------------------------------------------------------------------------------------|
| <b>Nodes</b><br>Gene node and symbol  GeneSymbol<br>Expression profile  left datapoint - apical region<br>middle datapoint - middle region<br>right datapoint - basal region<br>Metabolite  Glucose<br>Enzyme commission number (EC)  n.n.n.n | <b>Border (expression level)</b><br>Low transcript levels <br>High transcript levels <br><b>Size (transcript enrichment in testis)</b><br>Not testis specific / not enriched in testis <br>Testis specific / enriched in testis  | <b>Shape (significant differences)</b><br>No significant differences <br>1 significant difference <br>2 significant differences <br>3 significant differences  |
|-------------------------------------------------------------------------------------------------------------------------------------------------------------------------------------------------------------------------------------------------------------------------------------------------------------------------------------------------------------------------------------------------------------------------------------------------------------------------------------------------------------------------------------------------------------------------------------------|------------------------------------------------------------------------------------------------------------------------------------------------------------------------------------------------------------------------------------------------------------------------------------------------------------------------------------------------------------------------------------------------------------------------------------------------------------------------------------------------------------------------------------------------------------------------------|--------------------------------------------------------------------------------------------------------------------------------------------------------------------------------------------------------------------------------------------------------------------------------------------------------------------------------------------------------------------------------------------------------------------------------------------------------------------------------------------------------------------|

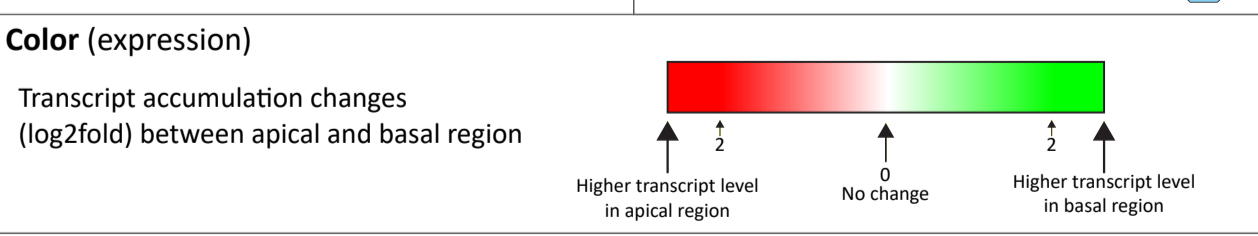

| Key to enzyme commission number                                                   | EC number | Enzyme name                                                | EC number | Enzyme name                                    | EC number | Enzyme name                             |
|-----------------------------------------------------------------------------------|-----------|------------------------------------------------------------|-----------|------------------------------------------------|-----------|-----------------------------------------|
|  | 1.1.1.27  | L-lactate dehydrogenase                                    | 2.4.1.1   | phosphorylase                                  | 4.1.1.32  | phosphoenolpyruvate carboxykinase (GTP) |
|  | 1.1.1.37  | malate dehydrogenase                                       | 2.4.1.11  | glycogen(starch) synthase                      | 4.1.2.13  | fructose-bisphosphate aldolase          |
|  | 1.1.1.41  | isocitrate dehydrogenase (NAD+)                            | 2.4.1.15  | α,α-trehalose-phosphate synthase (UDP-forming) | 4.2.1.11  | phosphopyruvate hydratase               |
|  | 1.1.1.42  | isocitrate dehydrogenase (NADP+)                           | 2.4.1.18  | 1,4-α-glucan branching enzyme                  | 4.2.1.2   | fumarate hydratase                      |
|  | 1.1.1.95  | phosphoglycerate dehydrogenase                             | 2.7.1.1   | ketohexokinase                                 | 4.2.1.3   | aconitate hydratase                     |
|  | 1.2.1.41  | glyceraldehyde-3-phosphate dehydrogenase (phosphorylating) | 2.7.1.11  | 6-phosphofructokinase                          | 5.1.3.15  | glucose-6-phosphate 1-epimerase         |
|  | 1.2.1.27  | methylmalonate-semialdehyde dehydrogenase (acylating)      | 2.7.1.147 | ADP-dependent glucokinase                      | 5.1.3.3   | aldose 1-epimerase                      |
|  | 1.2.1.3   | aldehyde dehydrogenase (NAD+)                              | 2.7.1.3   | ketohexokinase                                 | 5.2.1.2   | maleylacetate isomerase                 |
|  | 1.2.4.1   | pyruvate dehydrogenase (acetyl-transferring)               | 2.7.1.40  | pyruvate kinase                                | 5.3.1.1   | triose-phosphate isomerase              |
|                                                                                   | 1.2.4.2   | oxoglutarate dehydrogenase (succinyl-transferring)         | 2.7.2.3   | phosphoglycerate kinase                        | 5.3.1.8   | mannose-6-phosphate isomerase           |
|                                                                                   | 1.3.5.1   | succinate dehydrogenase (quinone)                          | 2.7.7.9   | glucose-1-phosphate uridylyltransferase        | 5.3.1.9   | glucose-6-phosphate isomerase           |
|                                                                                   | 1.8.1.4   | dihydropyridyl dehydrogenase                               | 3.1.3.11  | fructose-bisphosphatase                        | 5.4.2.11  | phosphoglycerate mutase                 |
|                                                                                   | 1.8.1.12  | dihydropyridyllysine-residue acetyltransferase             | 3.1.3.12  | trehalose-bisphosphatase                       | 5.4.2.2   | phosphoglucomutase                      |
|                                                                                   | 2.3.1.16  | acetyl-CoA C-acyltransferase                               | 3.1.3.46  | fructose-2,6-bisphosphate 2-phosphatase        | 6.2.1.2   | Acid-thiol ligomutase                   |
|                                                                                   | 2.3.1.61  | dihydropyridyllysine-residue succinyltransferase           | 3.1.3.9   | glucose-6-phosphatase                          | 6.2.1.4   | succinate-CoA ligase (GDP-forming)      |
|                                                                                   | 2.3.3.1   | citrate (Si)-synthase                                      | 3.2.1.28  | α,α-trehalase                                  | 6.2.1.5   | succinate-CoA ligase (ADP-forming)      |
|                                                                                   | 2.3.3.8   | ATP citrate synthase                                       | 3.7.1.5   | acylpyruvate hydrolase                         | 6.4.1.1   | pyruvate carboxylase                    |

FigS.5. Distribution of transcripts of genes involved in citrate cycle and the sugar metabolism visualized by Cytoscape.

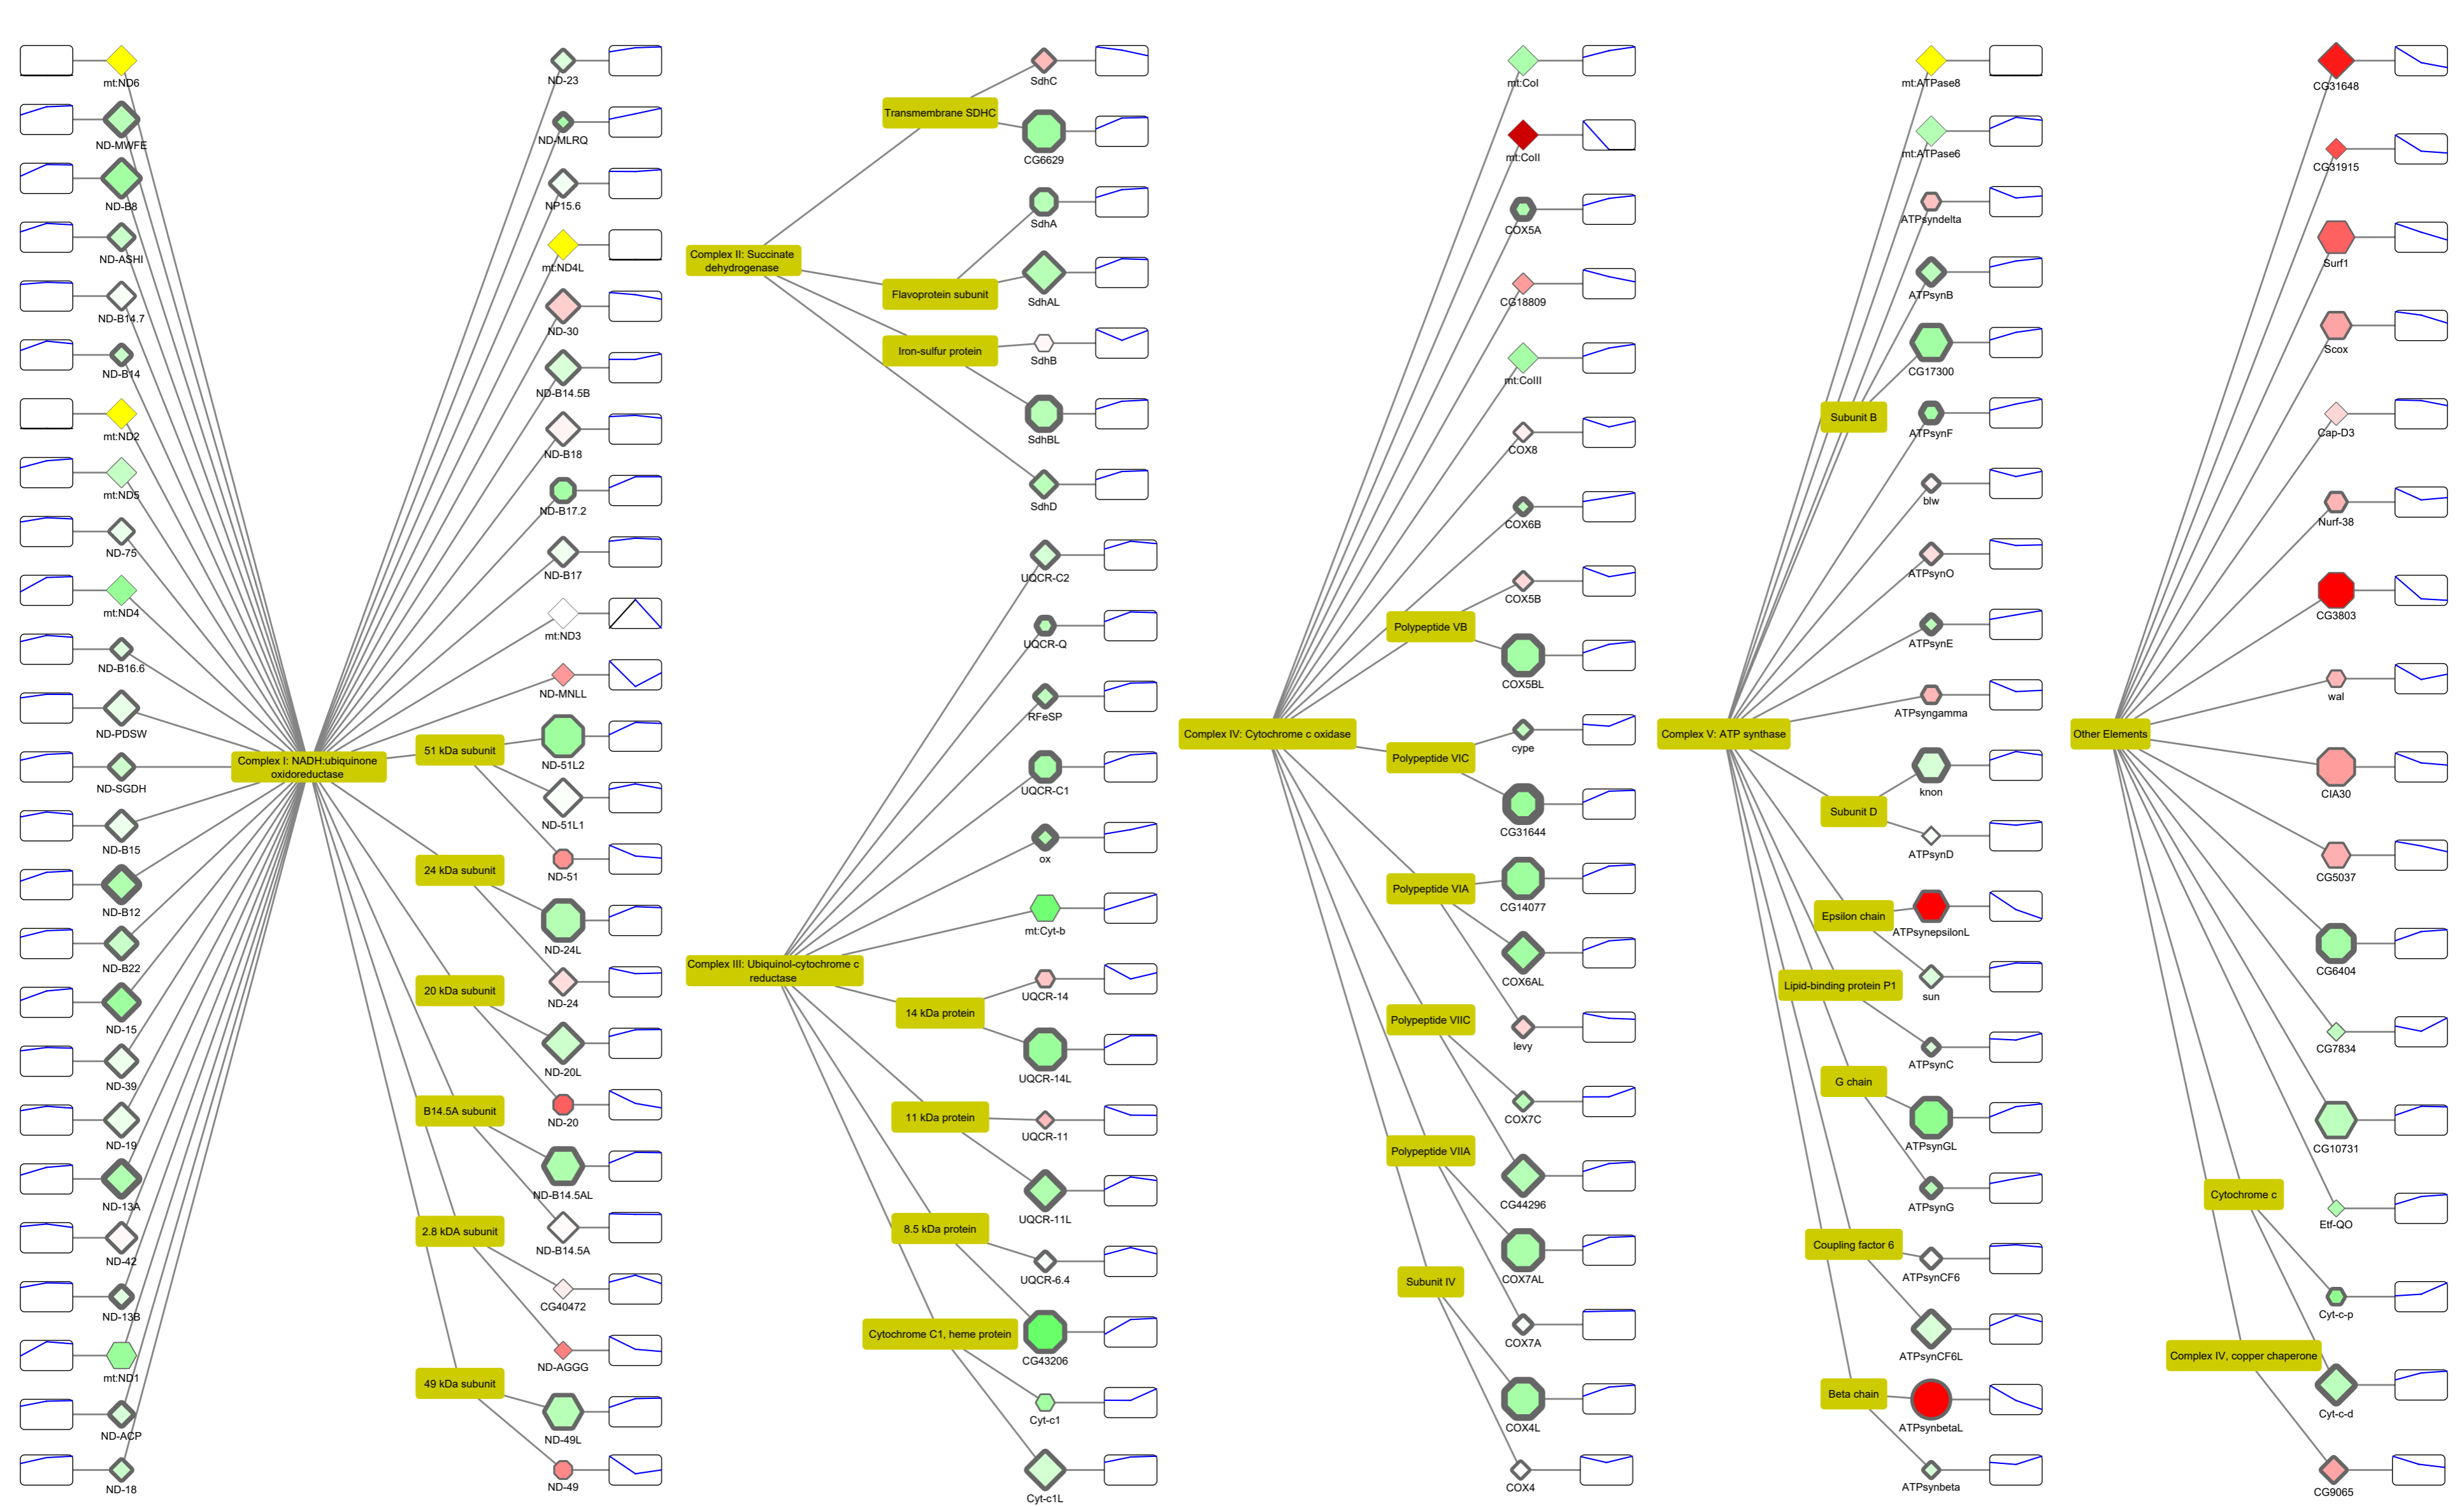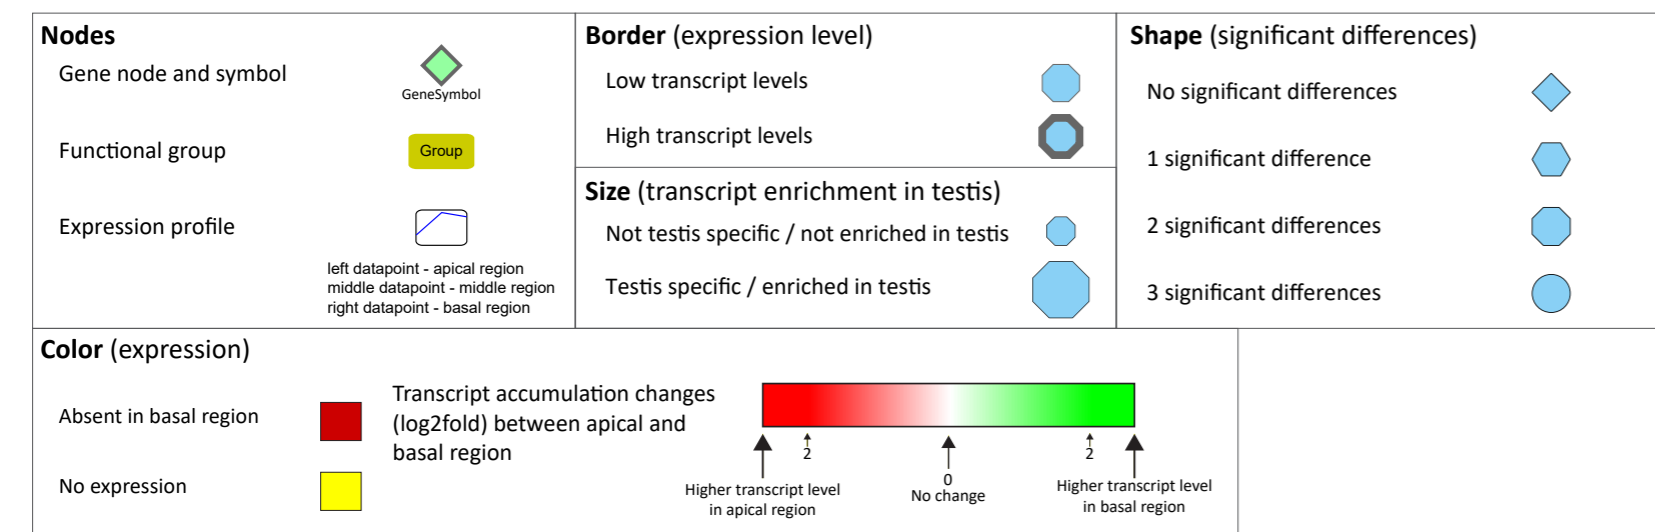

FigS.6. Distribution of transcripts of genes of OXPHOS visualized by Cytoscape.

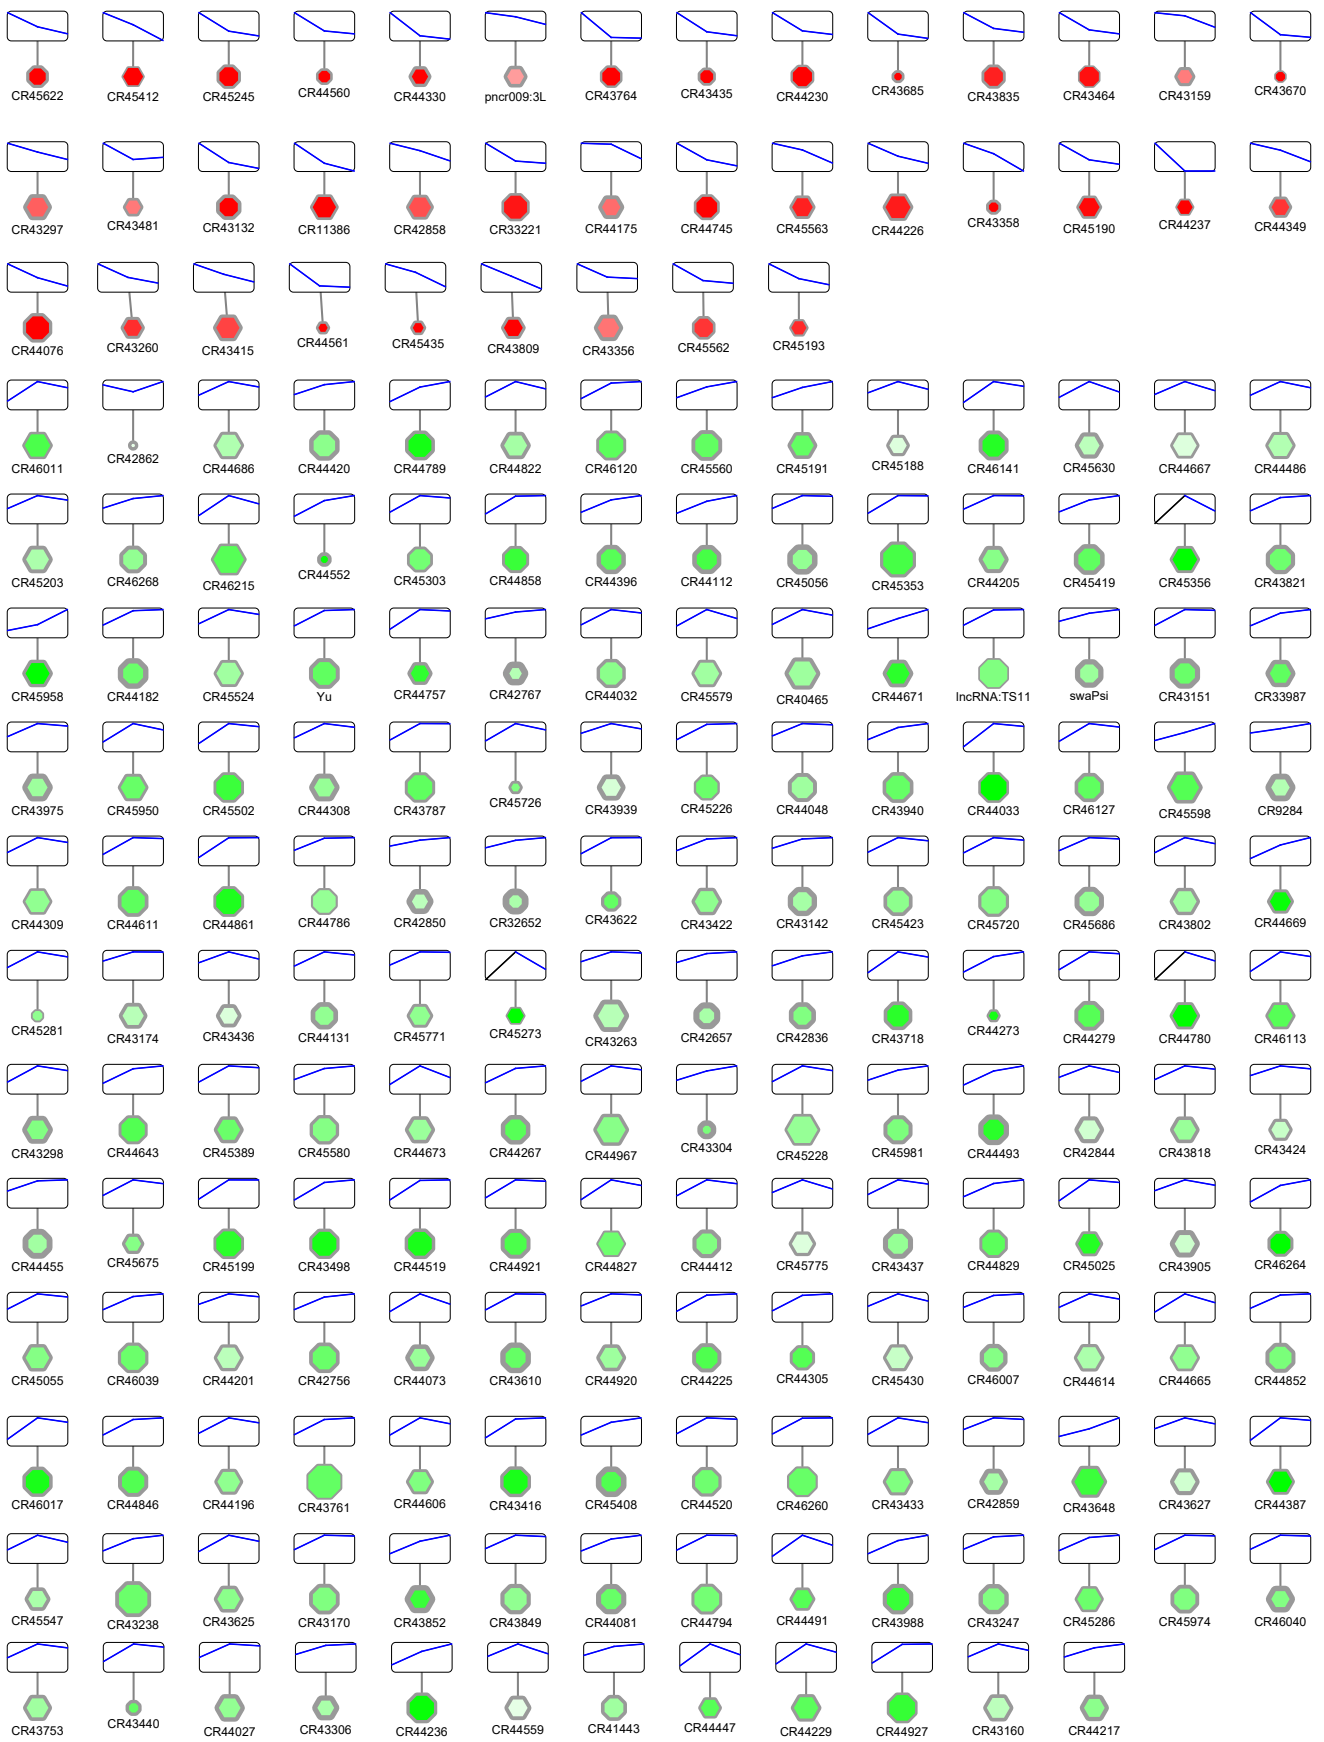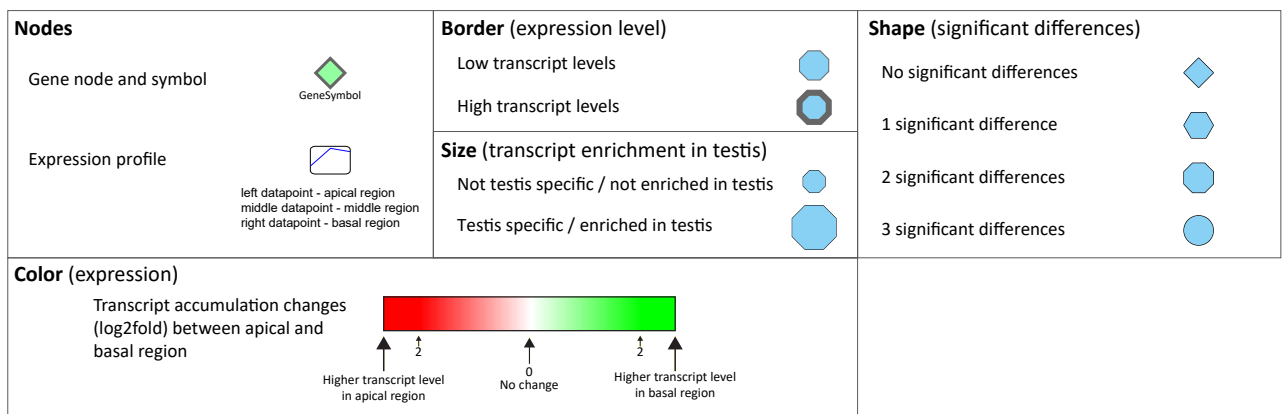

**FigS.7. Distribution of transcripts of long non-coding RNA genes with significant differences visualized by Cytoscape.**
